# Supplementary material for: Metal-ion-assisted hydrolysis of dipeptides involving a serine residue in a neutral aqueous solutionElectronic supplementary information (ESI) available: Kinetic studies involving pH and concentration profiles of the rate constant. See http://www.rsc.org/suppdata/ob/b2/b209565c/
Source: Royal Society of Chemistry journal article supplement (doi:10.1039/b209565c), 2003-01-23

## Supplementary data

### Supplementary Information (Yashiro et al.)

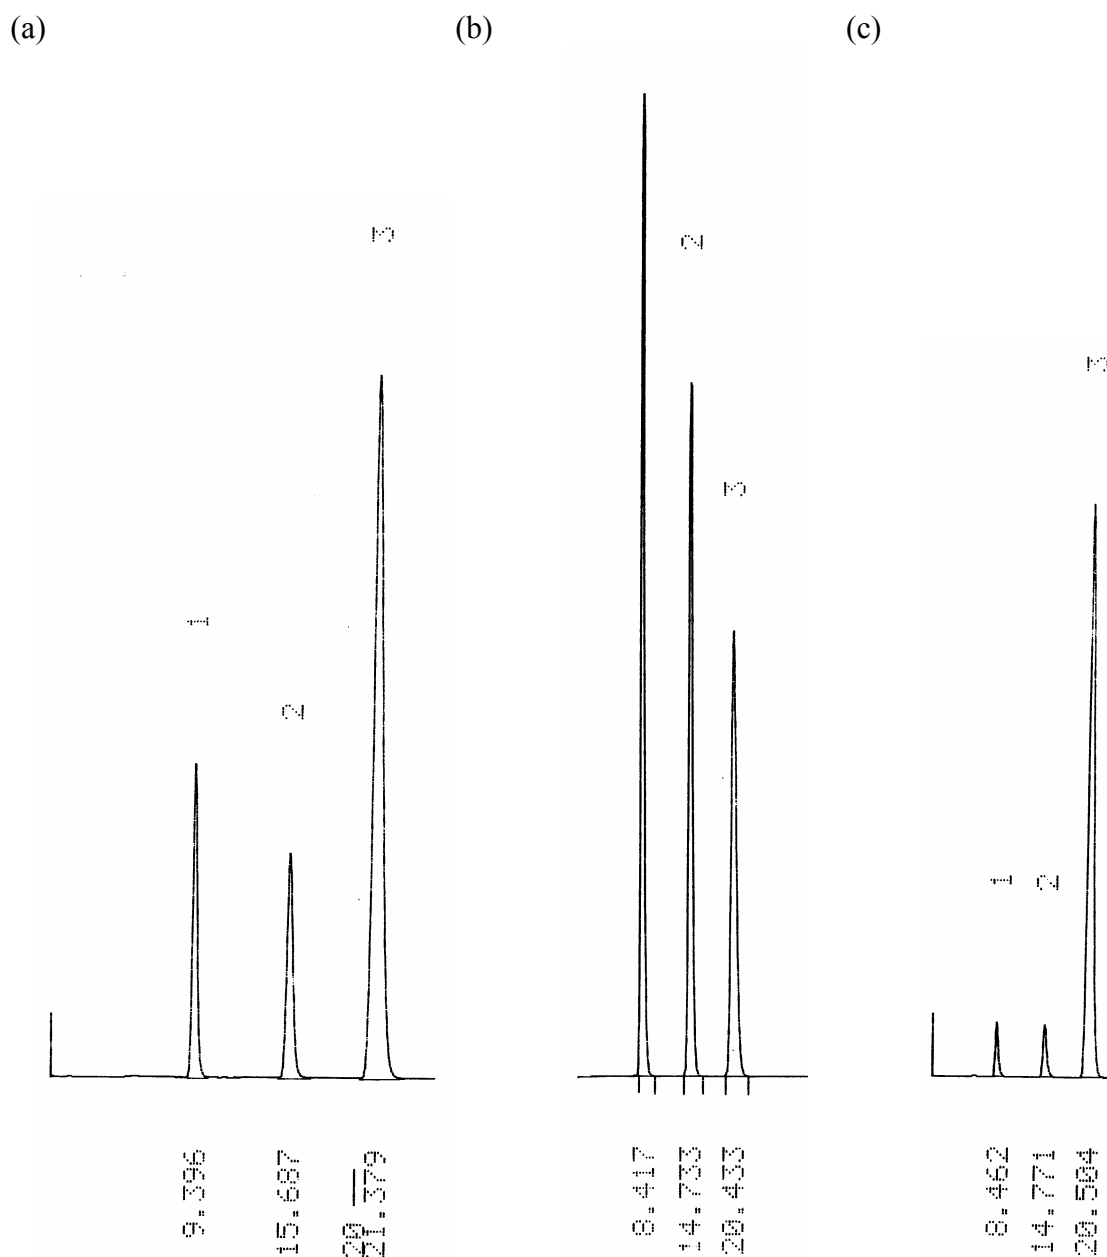

**Fig. 6** Typical HPLC charts. Peak 1, Ser; peak 2, Gly; peak 3 Gly-Ser.

(a) Standard sample; a mixture of Gly (0.5 mM), Ser (0.5 mM) and Gly-Ser (10 mM).

(b) After the 24 h-reaction of Gly-Ser (10 mM) with  $\text{ZnCl}_2$  (10 mM) at pH 7.0 (HEPES 0.1 M) and 50 °C.

(c) After the 24 h-reaction of Gly-Ser (10 mM) without metal salt at pH 7.0 (HEPES 0.1 M) and 50 °C.

Elution times differed slightly depending on the eluent. Therefore, the elution times were reconfirmed by injecting standard samples, whenever the eluent was altered.

## Supplementary data

### Supplementary Information (Yashiro et al.)

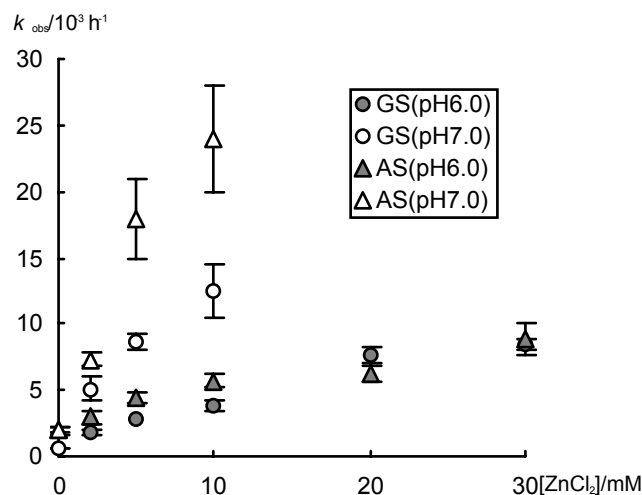

**Fig. 7** Effect of concentration of  $\text{ZnCl}_2$  on the rate constant for the dipeptide (10 mM) hydrolysis at 50 °C and pH 6.0 or 7.0. The rate constant at the  $\text{ZnCl}_2$ -concentration greater than 10 mM at pH 7.0, and at pH greater than 7.0 with  $[\text{ZnCl}_2] = 10$  mM could not be obtained because of the solubility of  $\text{ZnCl}_2$ .

Each plot of the rate constant as a function of the concentration of  $\text{ZnCl}_2$  showed a saturation curve. The  $1/[V_0]$  vs  $1/[\text{ZnCl}_2]$  plots (shown below) were not linear, indicating that the reactions do not obey standard Michaelis-Menten type kinetics.

## Supplementary data

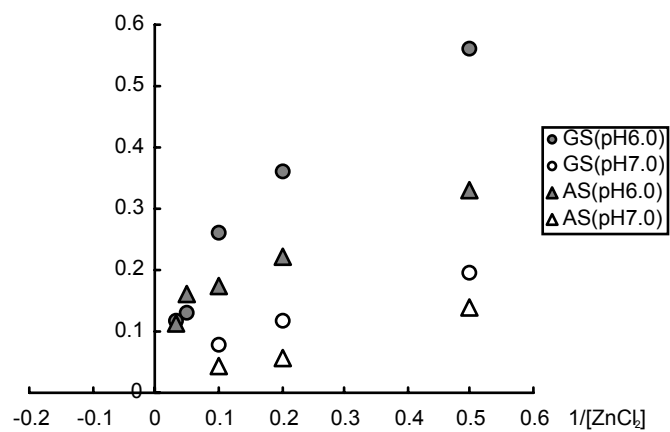

Supplement: b209565c.pdf [file b209565c.pdf]
